# Supplementary material for: The interaction of Kinesin-1 with its adaptor protein JIP1 can be regulated via proteins binding to the JIP1-PTB domain
Source: PubMed Central journal article supplement (PMC3599065; doi:10.1186/1471-2121-14-12), 2013-03-04

Supplemental figure 1

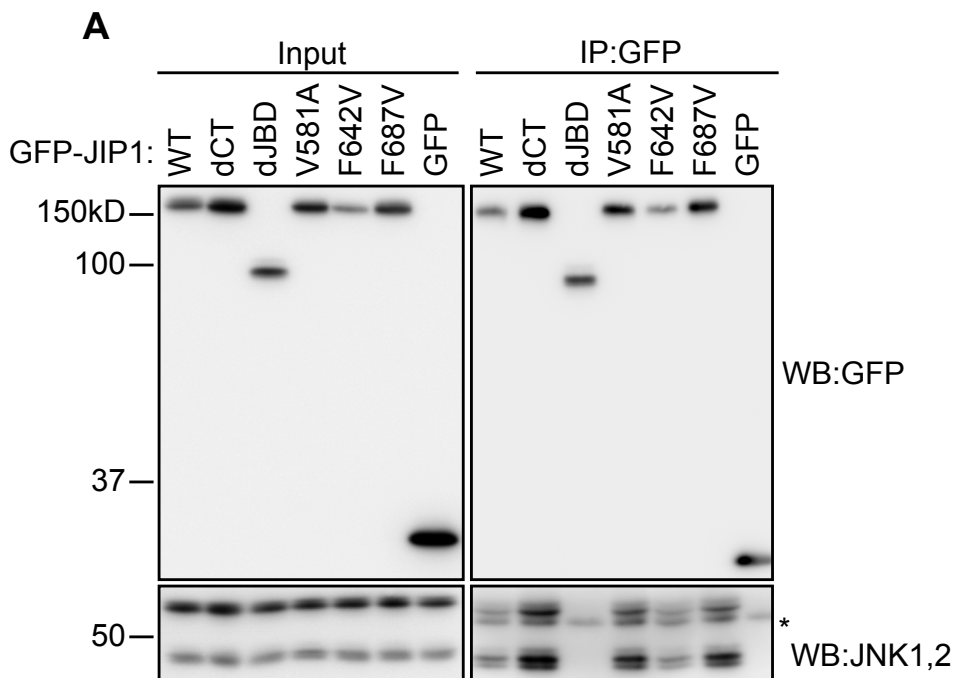

**B**

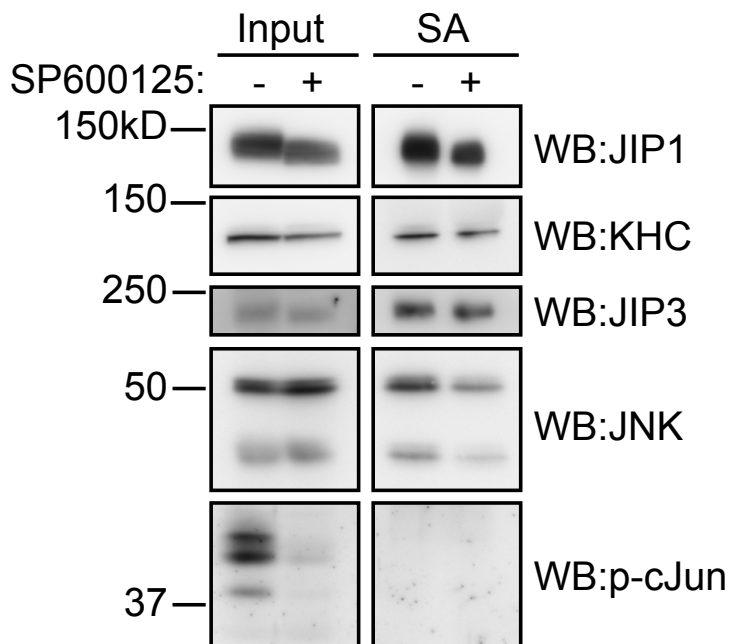

**C**

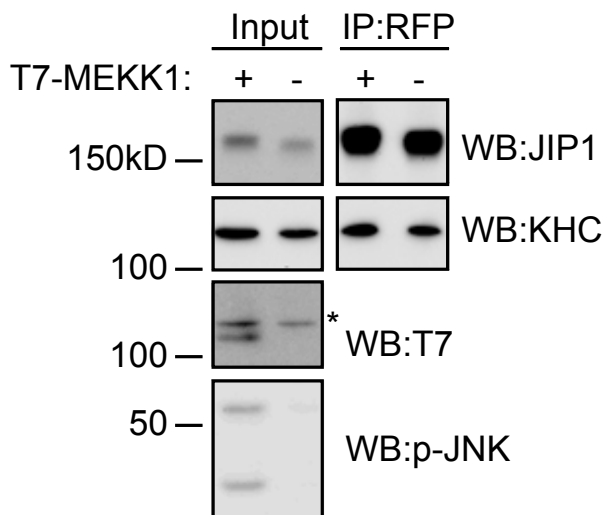

Supplement: 1471-2121-14-12-S1.pdf [file 1471-2121-14-12-S1.pdf]
