# Supplementary material for: The interaction of Kinesin-1 with its adaptor protein JIP1 can be regulated via proteins binding to the JIP1-PTB domain
Source: PubMed Central journal article supplement (PMC3599065; doi:10.1186/1471-2121-14-12), 2013-03-04
Supplement: 1471-2121-14-12-S3.pdf [file 1471-2121-14-12-S3.pdf]

### Supplemental figure 3

1 mmeiqmdegg gvvvyqddyc sgsvmser **VS GLAGSIYREF ERI** ihcydee vvkelmplv  
61 nvlendsvl senqehevel ellredneql ltqyerekal rkqaeekfie fedaleqekk  
121 **ELQIQVEHYE FQTR** qlelka knyadqisrl eeresemkke ynalhqrhthe miqtyvehie  
181 rskmqavggs gqtesslpgr srkerptsln vfpladgmvr aqmggklvpa gdhwhlsdlg  
241 qlqssssyqc pndemesegq ssaatpstt gtsntptss vpsaavtpln eslqplgdyv  
301 svtknnkqar ekrsnrnmev qvtqemrnvs igmgssdews dvqdiidstp eldvcpetri  
361 ertgssptqg ivnkafgint dslyhelsta gsevigdvde gadllgefsv rddffgmge  
421 vgnllensq lletknaInv vkndliakvd qlsgeqevlk geleakqak vklenrikel  
481 eeelkrvkse avtarrepre evedvssylc teldkipmaq rrrftrvema rvlmernqyk  
541 erlmelqeav rwtemirasr ehpsvqekkk stiwqffsrl fsssspppa kr **SYPSVNIH**  
601 **YKSPTAAGFS QR**rshalcqi sagsrpleff pddctssar reqkrepyrq vrehvrnddg  
661 rlqacgwslp akykqlspng gqedtrmknv pvpvycrplv ekdpstklwc aagvnlsgwk  
721 pheedssngp kpvpgrdplt cdregegek sthpspekkk aketpeadat ssrvwiltst  
781 lttskvviid anqpgtivdq ftvcnahlvc issipaasds dyppgemfld sdvnpedsga  
841 dgvlagitlv gcatrcnvpr sncssrgdtp vldkgqgdva ttangkvnps qsteateat  
901 evpdpgpses eattvrpgpl tehvftdpap tpsstqpas engsesngti vqpqvepsge  
961 lstttssaap tmwlgaqngw lyhsavanw kkclhsiklk dsvlslvhvk grvlvaladg  
1021 tlaifhrged gqwdlsnyhl mdrghphhsi rcnavvndrv wcgyknkvhv iqpktmqiek  
1081 sfdahprres qvrqlawigd gvwvsirds tlrlyhahth qhlqdvdiép yvskmlgtgk  
1141 lgfsfvrita lliagnrlwv gtgngvvisi pltetvvlhr gqllglrank tsptsgegtr  
1201 pggiihvygd dssdkaassf ipycsmaaq lcfhghrdav kffvsvpgnv latlngsvld  
1261 spsegpgpaa paadaegqkl **kNALVLSGGE GYIDFR** igdg eddetecag dvnqtkspls  
1321 kaershiivw qvsytpe
