# Supplementary material for: The interaction of Kinesin-1 with its adaptor protein JIP1 can be regulated via proteins binding to the JIP1-PTB domain
Source: PubMed Central journal article supplement (PMC3599065; doi:10.1186/1471-2121-14-12), 2013-03-04
Supplement: 1471-2121-14-12-S4.pdf [file 1471-2121-14-12-S4.pdf]

# Supplemental figure 4



**(B)**

Relative intensity of bound kinesin-1

|              | NS   | shJIP3 | shJIP3+TAP-JIP3 |           |
|--------------|------|--------|-----------------|-----------|
|              |      |        | JIP3-WT         | JIP3-LZ4A |
| Experiment 1 | 1.00 | 0.47   | 1.02            | 0.40      |
| Experiment 2 | 1.00 | 0.24   | 0.62            | 0.30      |

**(C)**



**(D)**
